# Supplementary material for: Fluorescent phenoxy benzoxazole complexes of zirconium and hafnium: synthesis, structure and photo-physical behaviour
Source: Royal Society of Chemistry journal article supplement (doi:10.1039/c8dt01757c), 2018-01-01
Supplement: c8dt01757c1.pdf [file c8dt01757c1.pdf]

## Supplementary Information

# Fluorescent phenoxy benzoxazole complexes of zirconium and hafnium: synthesis, structure and photo-physical behaviour

Lisa Kuhlmann,<sup>a</sup> Rafael Methling,<sup>a</sup> Jasmin Simon,<sup>a</sup> Beate Neumann,<sup>a</sup> Hans-Georg Stammler,<sup>a</sup> Darío Gonzalez-Abradelo,<sup>b</sup> Cristian A. Strasser<sup>b</sup> and Norbert W. Mitzel<sup>a</sup>

<sup>a</sup> Fakultät für Chemie, Lehrstuhl für Anorganische Chemie und Strukturchemie (ACS),  
Centrum für molekulare Materien CM<sub>2</sub>, Universität Bielefeld, Universitätsstraße 25, D-33615  
Bielefeld, Germany.

<sup>b</sup> Institute of Physics and Center for Nanotechnology, Westfälische Wilhelms-Universität  
Münster, Heisenbergstraße 11, D-48149 Münster, Germany.

## **Table of contents**

### **NMR spectroscopic data**

|            |       |
|------------|-------|
| Compound 1 | S3    |
| Compound 2 | S4    |
| Compound 3 | S5    |
| Compound 4 | S6    |
| Compound 5 | S7-S8 |

|                              |    |
|------------------------------|----|
| <b>Crystallographic data</b> | S9 |
|------------------------------|----|

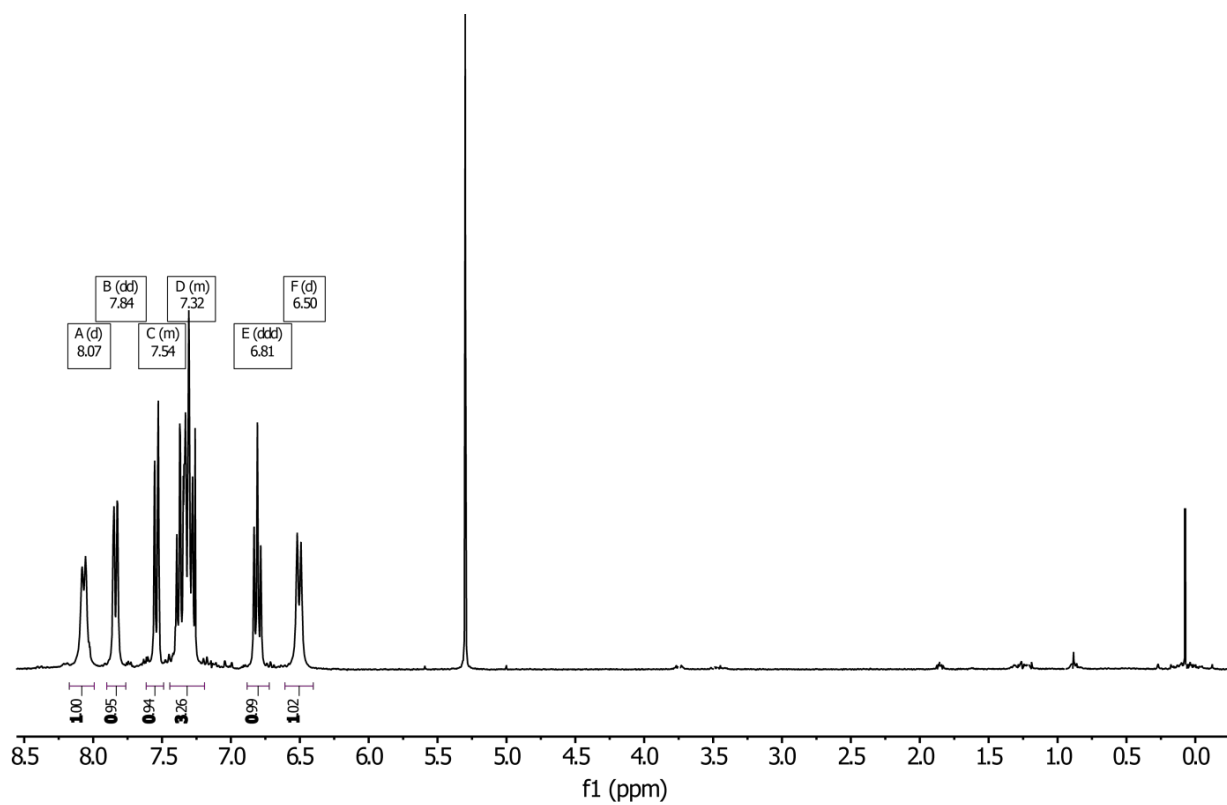

**Figure S1.** <sup>1</sup>H NMR spectrum of a solution of complex 1 in CDCl<sub>3</sub> measured at rt.

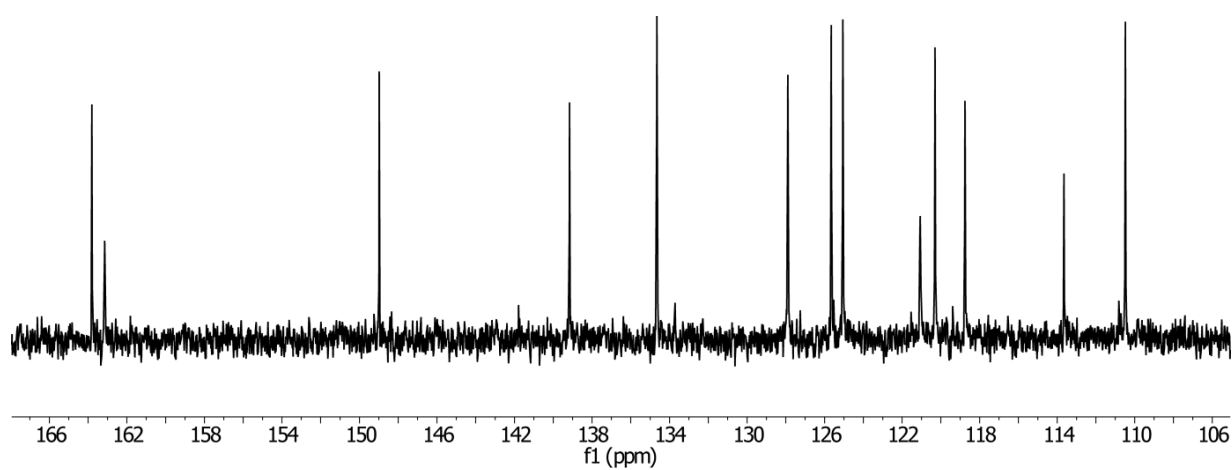

**Figure S2.** <sup>13</sup>C{<sup>1</sup>H} NMR spectrum of a solution of complex 1 in CDCl<sub>3</sub> measured at rt.

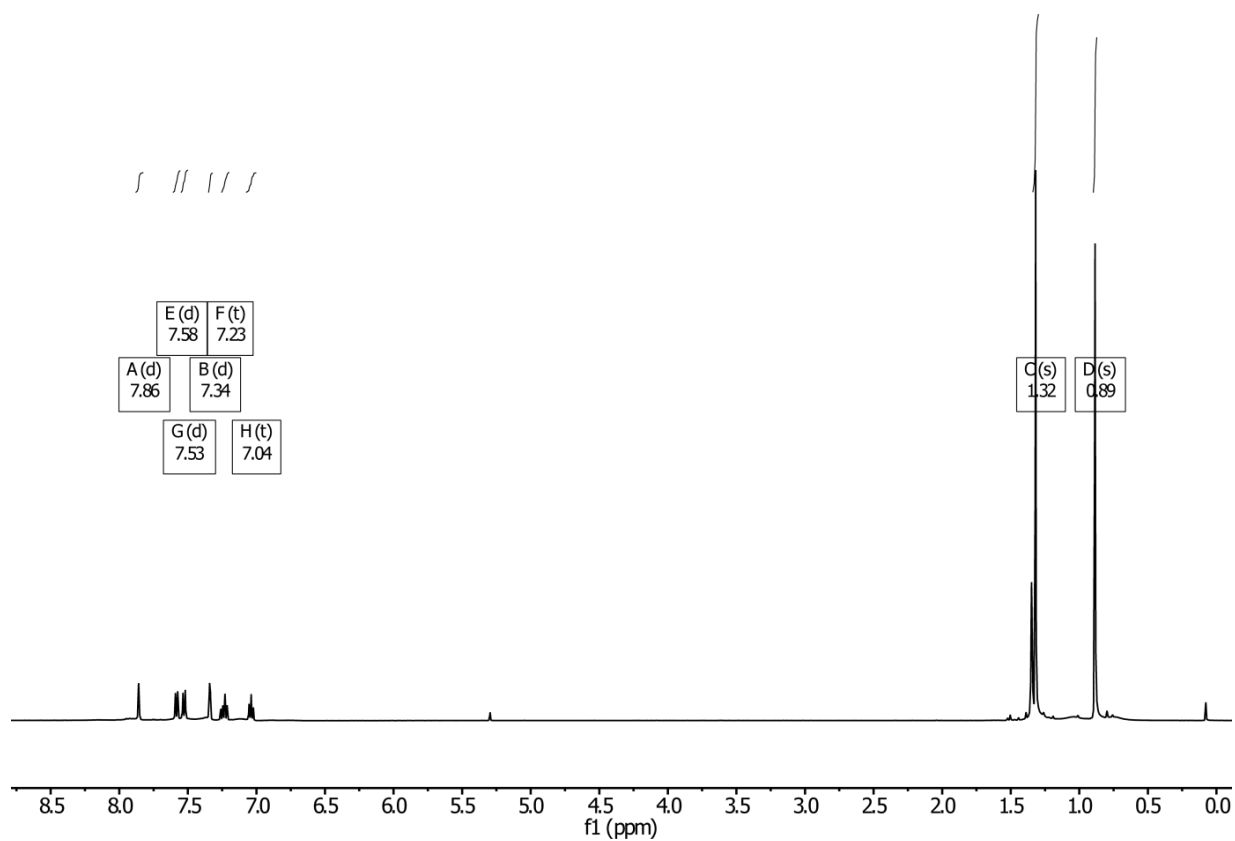

**Figure S3.**  $^1\text{H}$  NMR spectrum of a solution of complex **2** in  $\text{CDCl}_3$  measured at rt.

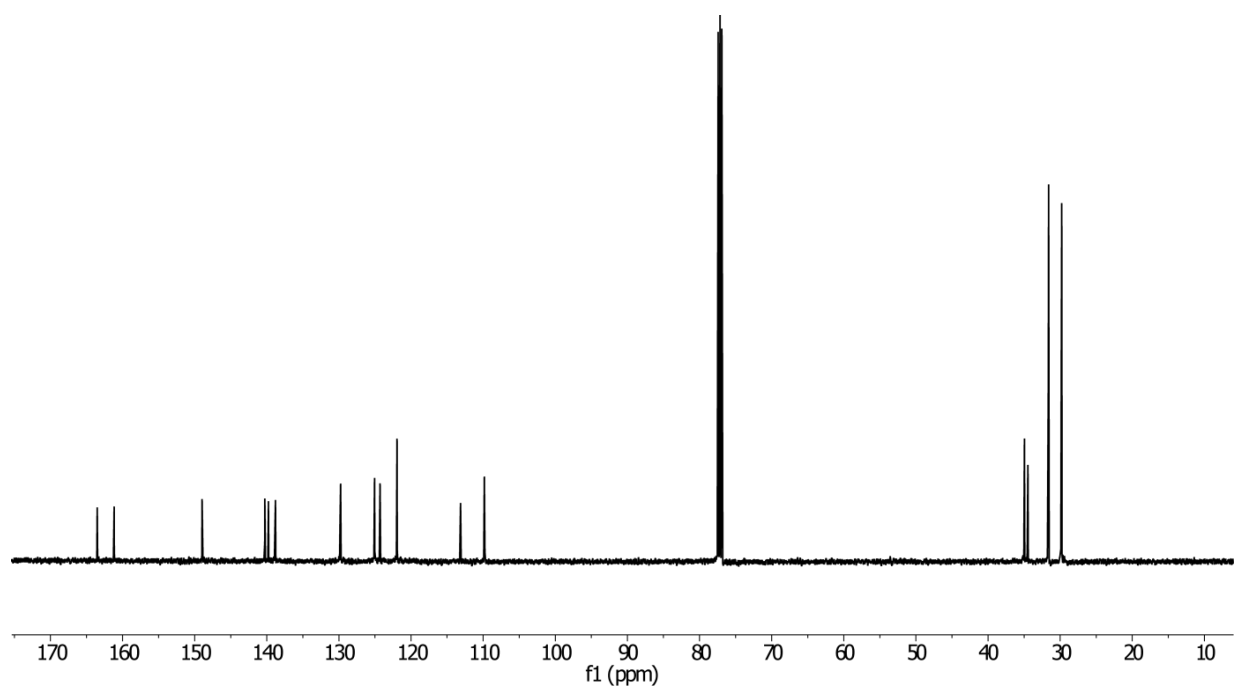

**Figure S4.**  $^{13}\text{C}\{^1\text{H}\}$  NMR spectrum of a solution of complex **2** in  $\text{CDCl}_3$  measured at rt.

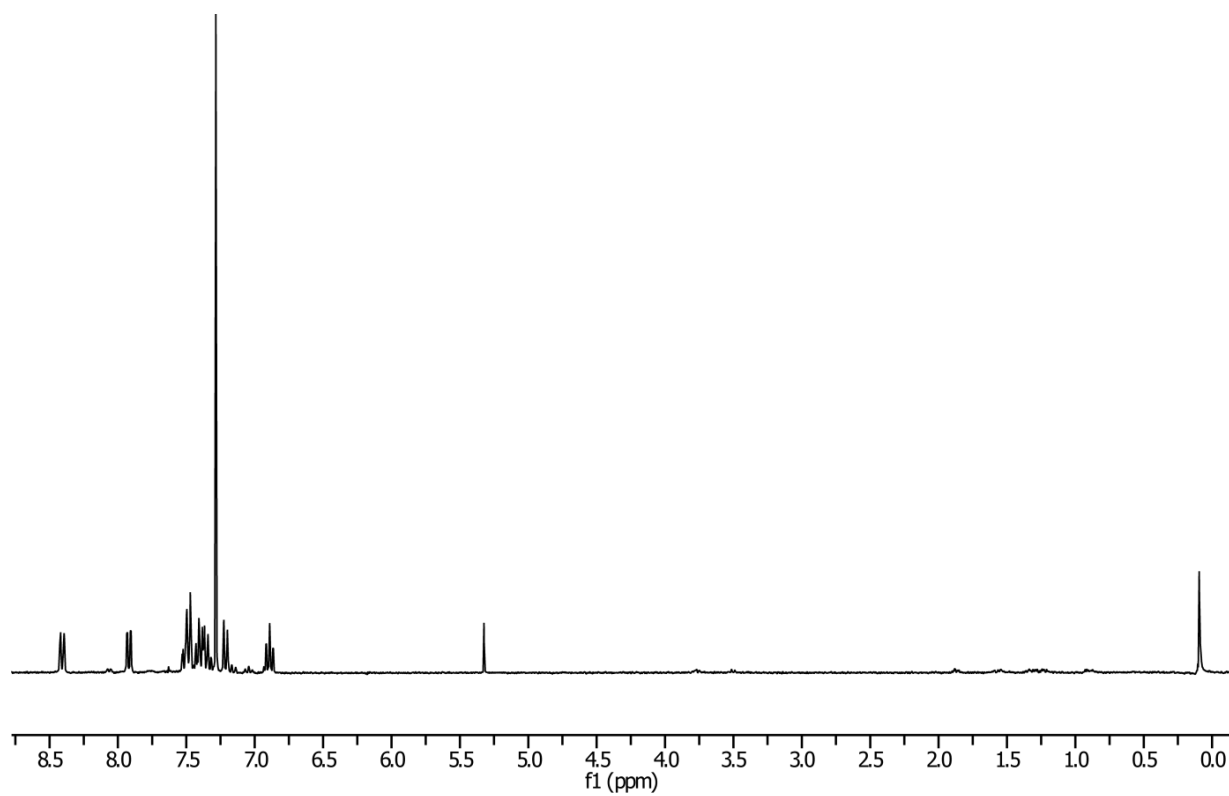

**Figure S5.**  $^1\text{H}$  NMR spectrum of a solution of complex **3** in  $\text{CDCl}_3$  measured at rt.

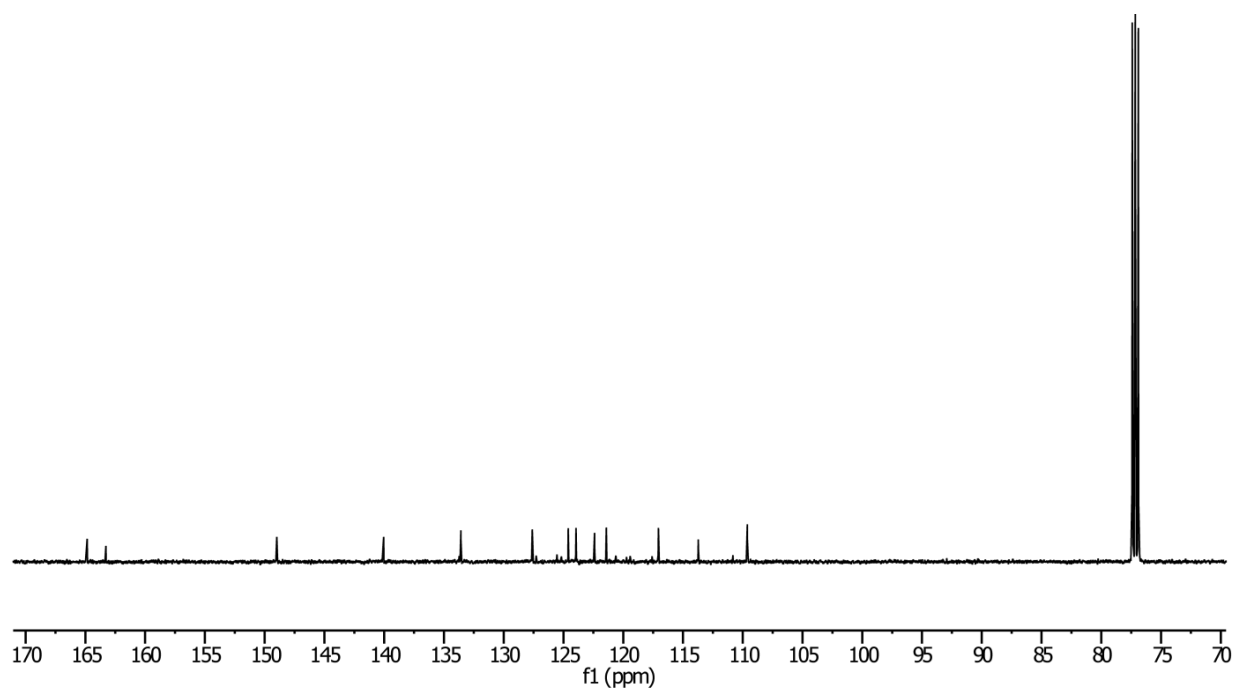

**Figure S6.**  $^{13}\text{C}\{^1\text{H}\}$  NMR spectrum of a solution of complex **3** in  $\text{CDCl}_3$  measured at rt.

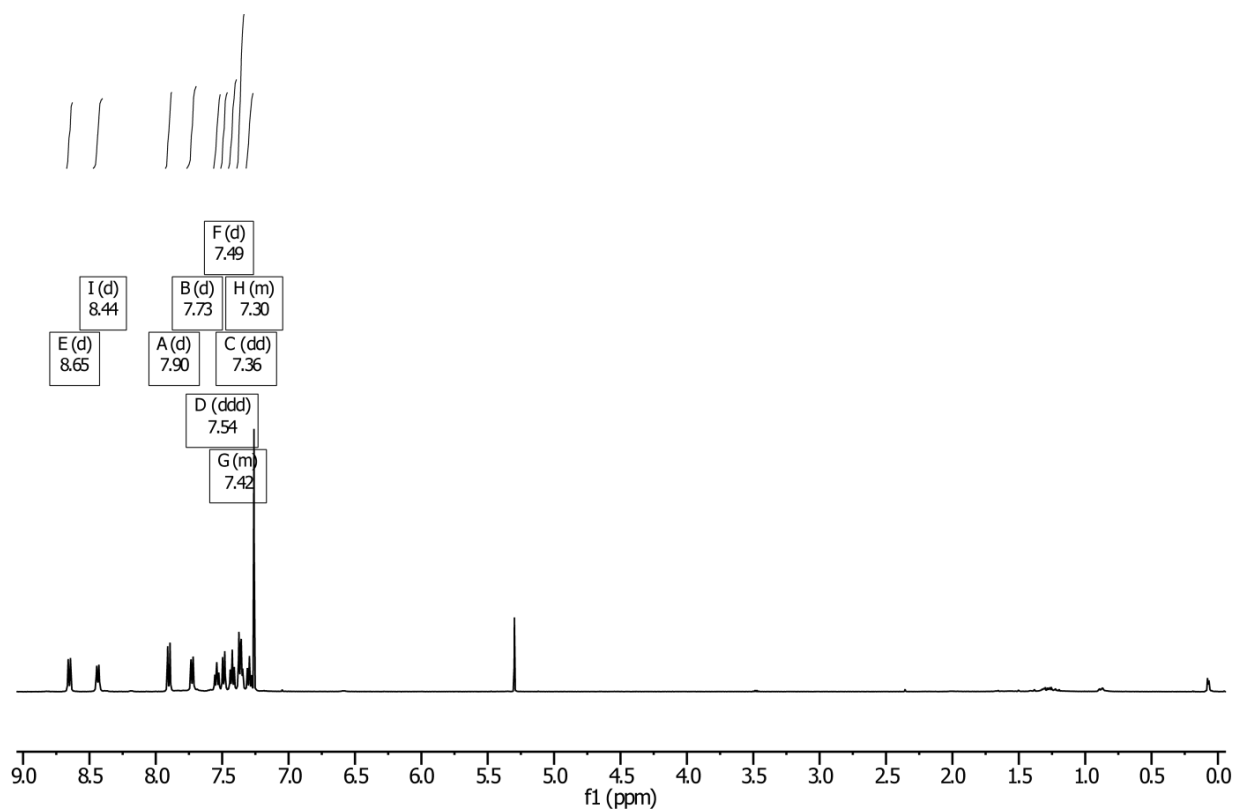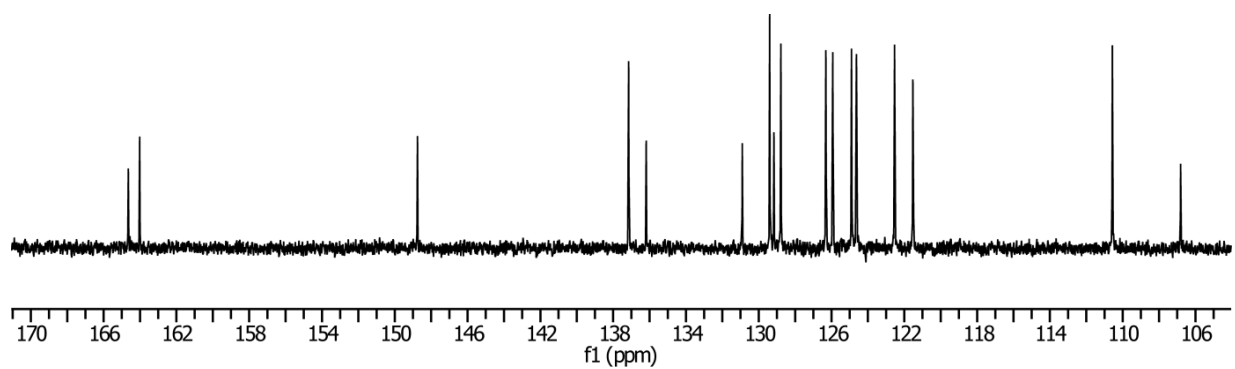

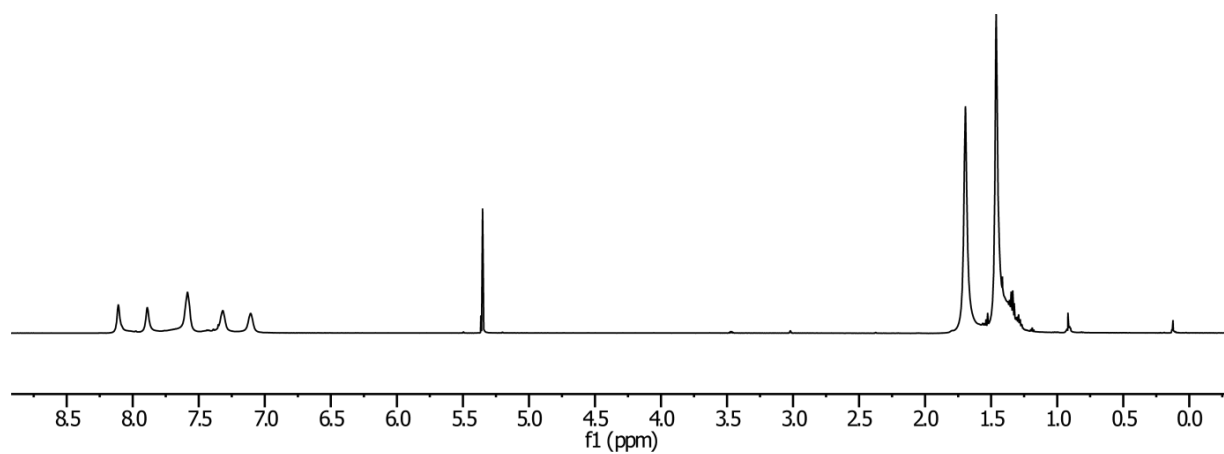

**Figure S9.**  $^1\text{H}$  NMR spectrum of a solution of complex **5** in  $\text{CDCl}_3$  measured at rt.

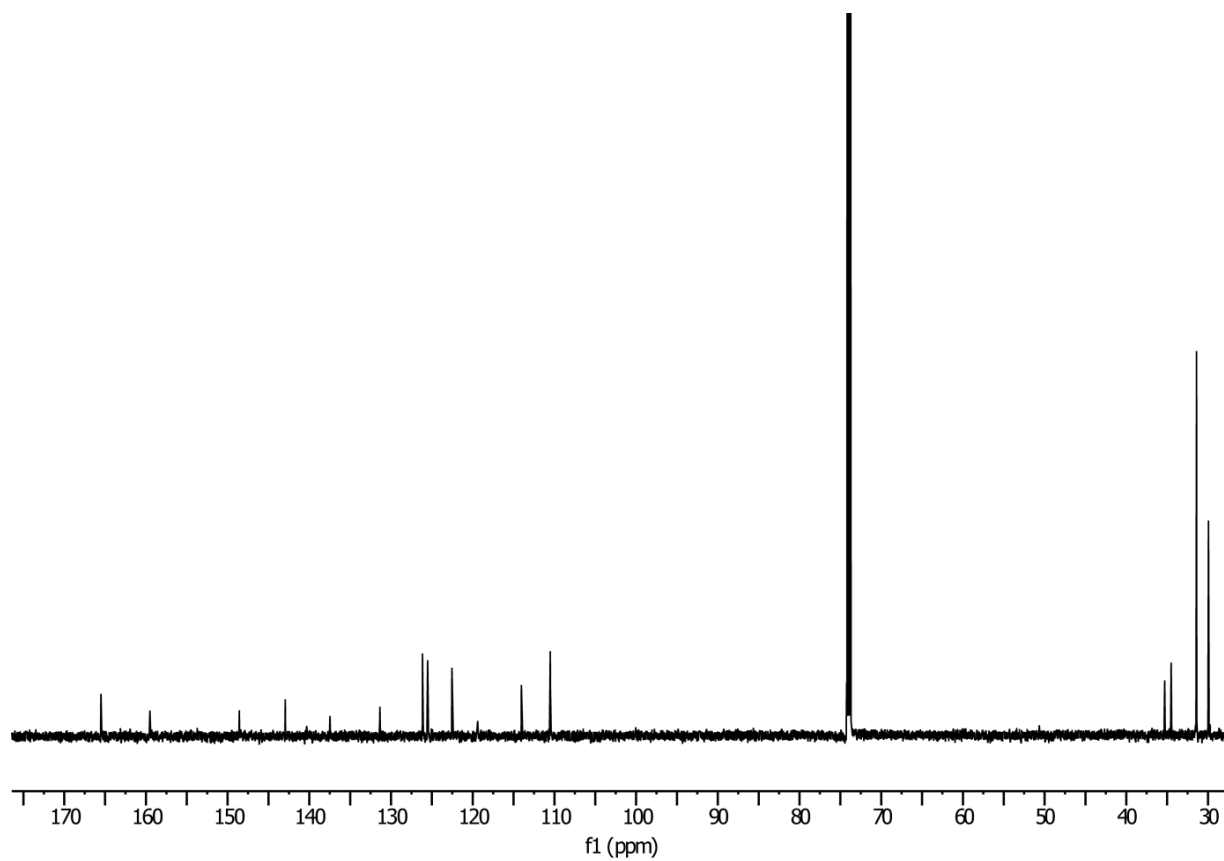

**Figure S10.**  $^{13}\text{C}\{^1\text{H}\}$  NMR spectrum of a solution of complex **5** in  $\text{CDCl}_3$  measured at 373 K.

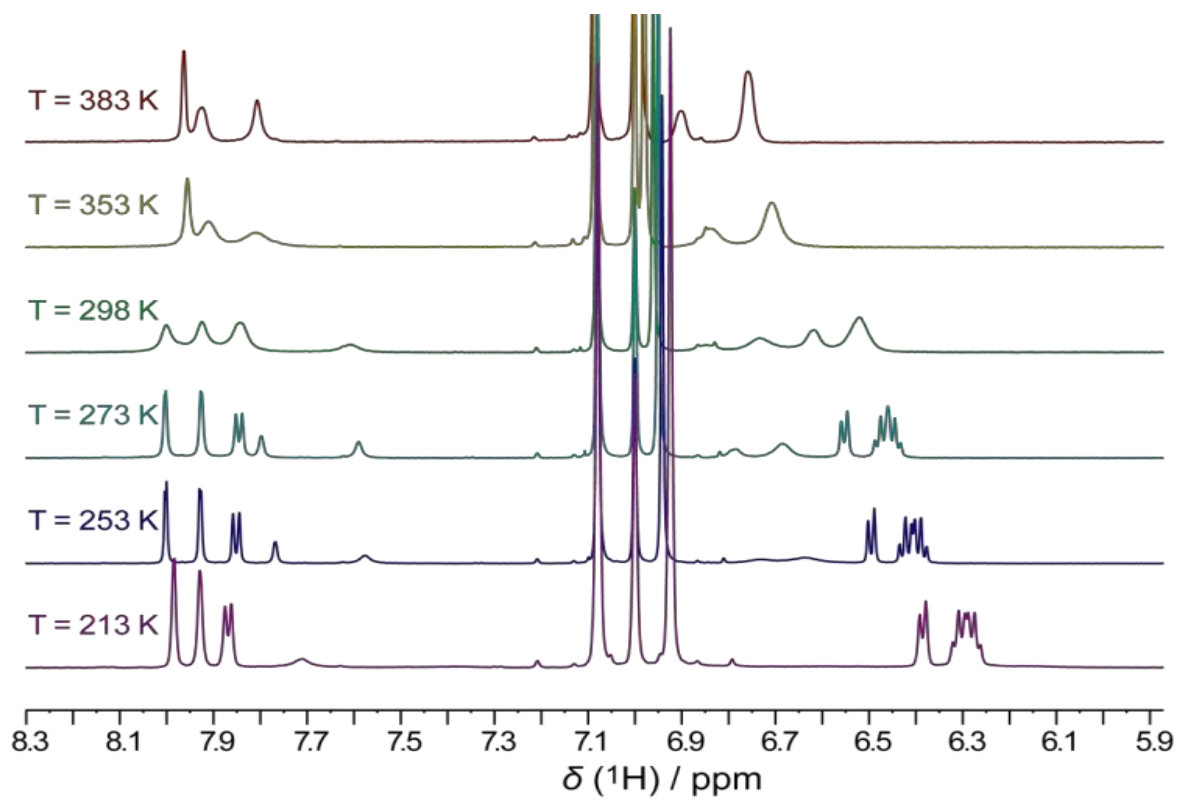

**Figure S11.** Temperature dependent  $^1\text{H}$  NMR spectra of compound **5** in toluene- $d_8$ .



**Table S1.** Crystallographic data of compounds **1** – **5**.

|                                                                                      | <b>1</b>                                                           | <b>2</b>                                                           | <b>3</b>                                                                        | <b>4</b>                                                                        | <b>5</b>                                                                         |
|--------------------------------------------------------------------------------------|--------------------------------------------------------------------|--------------------------------------------------------------------|---------------------------------------------------------------------------------|---------------------------------------------------------------------------------|----------------------------------------------------------------------------------|
| Empirical formula                                                                    | C <sub>47</sub> H <sub>40</sub> ClN <sub>3</sub> O <sub>8</sub> Zr | C <sub>63</sub> H <sub>72</sub> ClN <sub>3</sub> O <sub>6</sub> Zr | C <sub>26</sub> H <sub>16</sub> Cl <sub>2</sub> HfN <sub>2</sub> O <sub>4</sub> | C <sub>38</sub> H <sub>28</sub> Cl <sub>2</sub> HfN <sub>2</sub> O <sub>5</sub> | C <sub>42</sub> H <sub>48</sub> N <sub>2</sub> O <sub>4</sub> Cl <sub>2</sub> Hf |
| <i>M<sub>r</sub></i>                                                                 | 901.49                                                             | 1093.90                                                            | 669.80                                                                          | 842.01                                                                          | 894.21                                                                           |
| Crystal system                                                                       | monoclinic                                                         | monoclinic                                                         | orthorhombic                                                                    | orthorhombic                                                                    | monoclinic                                                                       |
| Space group                                                                          | <i>P2<sub>1</sub>/c</i>                                            | <i>P2<sub>1</sub>/c</i>                                            | <i>Pna2<sub>1</sub></i>                                                         | <i>Pna2<sub>1</sub></i>                                                         | <i>P2<sub>1</sub>/n</i>                                                          |
| <i>a</i> [Å]                                                                         | 14.90366(12)                                                       | 16.4267(2)                                                         | 17.0405(2)                                                                      | 16.80102(10)                                                                    | 9.72013(6)                                                                       |
| <i>b</i> [Å]                                                                         | 19.19921(17)                                                       | 9.93661(12)                                                        | 11.75814(13)                                                                    | 13.26904(8)                                                                     | 17.14975(8)                                                                      |
| <i>c</i> [Å]                                                                         | 14.99834(15)                                                       | 34.2635(3)                                                         | 11.48058(13)                                                                    | 14.54335(10)                                                                    | 24.24585(13)                                                                     |
| $\beta$ [°]                                                                          | 111.6376(10)                                                       | 96.5453(11)                                                        | 90                                                                              | 90                                                                              | 98.7930(5)                                                                       |
| <i>V</i> [Å <sup>3</sup> ]                                                           | 3989.19(7)                                                         | 5556.22(12)                                                        | 2300.30(5)                                                                      | 3242.20(3)                                                                      | 3994.23(4)                                                                       |
| <i>Z</i>                                                                             | 4                                                                  | 4                                                                  | 4                                                                               | 4                                                                               | 4                                                                                |
| $\rho_{\text{calcd.}}$ [g cm <sup>-3</sup> ]                                         | 1.501                                                              | 1.308                                                              | 1.934                                                                           | 1.725                                                                           | 1.487                                                                            |
| $\mu$ [mm <sup>-1</sup> ]                                                            | 3.383                                                              | 2.490                                                              | 10.849                                                                          | 3.431                                                                           | 2.788                                                                            |
| <i>F</i> (000)                                                                       | 1856                                                               | 2304                                                               | 1296                                                                            | 1664                                                                            | 1808                                                                             |
| Radiation used                                                                       | Cu-K $\alpha$                                                      | Cu-K $\alpha$                                                      | Cu-K $\alpha$                                                                   | Mo-K $\alpha$                                                                   | Mo-K $\alpha$                                                                    |
| 2 $\theta$ range [°]                                                                 | 6.4-144.0                                                          | 5.4-144.0                                                          | 12.0-152.3                                                                      | 4.2-60.2                                                                        | 3.4-60.2                                                                         |
| Index range <i>h</i>                                                                 | -18 – 18                                                           | -20 – 18                                                           | -19 – 21                                                                        | -23 – 23                                                                        | -13 – 13                                                                         |
| Index range <i>k</i>                                                                 | -22 – 23                                                           | -12 – 12                                                           | -14 – 11                                                                        | -18 – 18                                                                        | -24 – 24                                                                         |
| Index range <i>l</i>                                                                 | -18 – 18                                                           | -42 – 42                                                           | -14 – 13                                                                        | -20 – 20                                                                        | -34 – 34                                                                         |
| Refl. collect.                                                                       | 72509                                                              | 112191                                                             | 9686                                                                            | 128732                                                                          | 231858                                                                           |
| Indep. refl.                                                                         | 7843                                                               | 10923                                                              | 4272                                                                            | 9535                                                                            | 11737                                                                            |
| <i>R</i> <sub>int</sub>                                                              | 0.0391                                                             | 0.0607                                                             | 0.0192                                                                          | 0.0344                                                                          | 0.0372                                                                           |
| Data/restraints                                                                      | 7843/0                                                             | 10923/0                                                            | 4272/1                                                                          | 9535/1                                                                          | 11737/0                                                                          |
| Parameters                                                                           | 545                                                                | 692                                                                | 317                                                                             | 434                                                                             | 472                                                                              |
| <i>R</i> <sub>1</sub> / <i>wR</i> <sub>2</sub> [ <i>I</i> > 2 $\sigma$ ( <i>I</i> )] | 0.026/0.063                                                        | 0.032/0.076                                                        | 0.017/0.045                                                                     | 0.014/0.035                                                                     | 0.021/0.055                                                                      |
| <i>R</i> <sub>2</sub> (all data)/ <i>wR</i> <sub>2</sub>                             | 0.029/0.065                                                        | 0.039/0.080                                                        | 0.017/0.046                                                                     | 0.015/0.035                                                                     | 0.023/0.057                                                                      |
| GoF on <i>F</i> <sup>2</sup>                                                         | 1.025                                                              | 1.026                                                              | 1.092                                                                           | 1.039                                                                           | 1.111                                                                            |
| $\rho_{\text{fin}}$ (max/min) [e <sup>-3</sup> ]                                     | 0.57/-0.52                                                         | 1.08/-0.55                                                         | 0.36/-0.49                                                                      | 0.33/-0.58                                                                      | 1.05/-0.92                                                                       |
| Flack parameter                                                                      |                                                                    |                                                                    | -0.025(7)                                                                       | 0.333(5) <sup>a</sup>                                                           |                                                                                  |
| CCDC no.                                                                             | 1817378                                                            | 1817379                                                            | 1817380                                                                         | 1817381                                                                         | 1817382                                                                          |
| Empirical formula                                                                    | C <sub>47</sub> H <sub>40</sub> ClN <sub>3</sub> O <sub>8</sub> Zr | C <sub>63</sub> H <sub>72</sub> ClN <sub>3</sub> O <sub>6</sub> Zr | C <sub>26</sub> H <sub>16</sub> Cl <sub>2</sub> HfN <sub>2</sub> O <sub>4</sub> | C <sub>38</sub> H <sub>28</sub> Cl <sub>2</sub> HfN <sub>2</sub> O <sub>5</sub> | C <sub>42</sub> H <sub>48</sub> N <sub>2</sub> O <sub>4</sub> Cl <sub>2</sub> Hf |
| <i>M<sub>r</sub></i>                                                                 | 901.49                                                             | 1093.90                                                            | 669.80                                                                          | 842.01                                                                          | 894.21                                                                           |
